# Supplementary material for: PTENP1 is a ceRNA for PTEN: it’s CRISPR clear
Source: PubMed Central journal article supplement (PMC7285706; doi:10.1186/s13045-020-00894-2), 2020-06-09
Supplement: 13045_2020_894_MOESM3_ESM.pdf [file 13045_2020_894_MOESM3_ESM.pdf]

**A**

sgRNA-PTENP1 CGGCAGCAGCTGCTGGATGG

**B**

*PTENP1 gene*

5'-CCACCATCCAGCAGCTGCTGCCG-3'  
3'-GGTGGTAGGTCGTCGACGACGGC-5'

*PTEN gene*

5'-CAACCATCCAGCAGCCGCCGAG-3'  
3'-GTTGGTAGGTCGTCGCGCGTC-5'

**C**

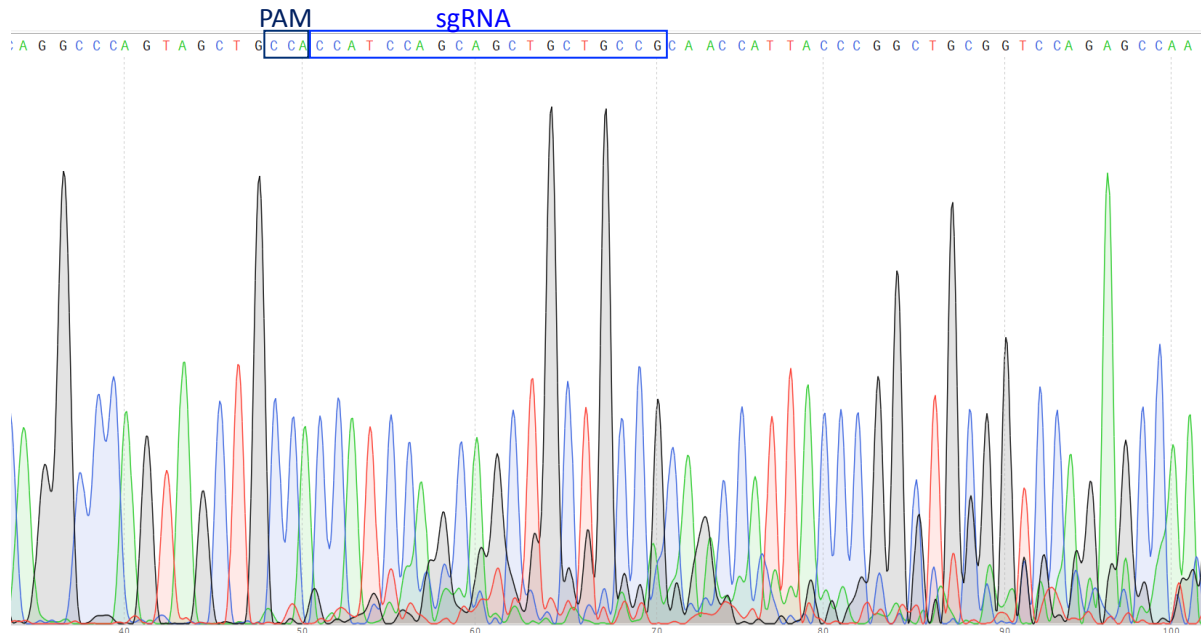

**Supplementary Figure 1.**

**a** sgRNA-PTENP1 sequence. **b** (left) *PTENP1* genomic sequence recognized by sgRNA-PTENP1 (bold), and PAM sequence (5'-TGG-3', underlined). (right) Orthologous *PTEN* genomic sequence. sgRNA-PTENP1 cannot mediate the cleavage of *PTEN* because of 4 mismatches (red), one of which falls in the PAM sequence. **c** Electropherogram of *PTENP1* genomic sequence, where the consequences of the cut by Cas9/sgRNA-PTENP1 are shown. The electropherogram was obtained by PCR analysis of the genomic DNA extracted from DU145-Cas9/sgRNA-PTENP1 double infected cells, 3 days after Cas9 induction using 2ug/ml doxycycline. The primers used for amplification were: Fw-attcgtcttctccccattcc; Rv-tctgcaggaaatcccatagc.
